# Supplementary material for: Salt-template-assisted synthesis of robust 3D honeycomb-like structured MoS2 and its application as a lithium-ion battery anode
Source: Royal Society of Chemistry journal article supplement (doi:10.1039/c6ta02565j), 2016-01-01
Supplement: c6ta02565j1.pdf [file c6ta02565j1.pdf]

# Supporting Information for

## **Salt-template-assisted synthesis of robust 3D honeycomb-like structured MoS<sub>2</sub> and its application as a lithium-ion battery anode**

Jingwen Zhou,<sup>a</sup> Jian Qin,<sup>a</sup> Naiqin Zhao,<sup>abc</sup> Chunsheng Shi,<sup>a</sup> En-Zuo Liu,<sup>ab</sup> Fang He,<sup>a</sup>

Jiajun Li<sup>a</sup> and Chunnian He <sup>\*abc</sup>

*<sup>a</sup> School of Materials Science and Engineering and Tianjin Key Laboratory of  
Composites and Functional Materials, Tianjin University, Tianjin 300072, China.*

*E-mail: cnhe08@tju.edu.cn*

*<sup>b</sup> Collaborative Innovation Center of Chemical Science and Engineering, Tianjin  
300072, China*

*<sup>c</sup> Key Laboratory of Advanced Ceramics and Machining Technology, Ministry of  
Education, Tianjin University, Tianjin, 300072, P. R. China*

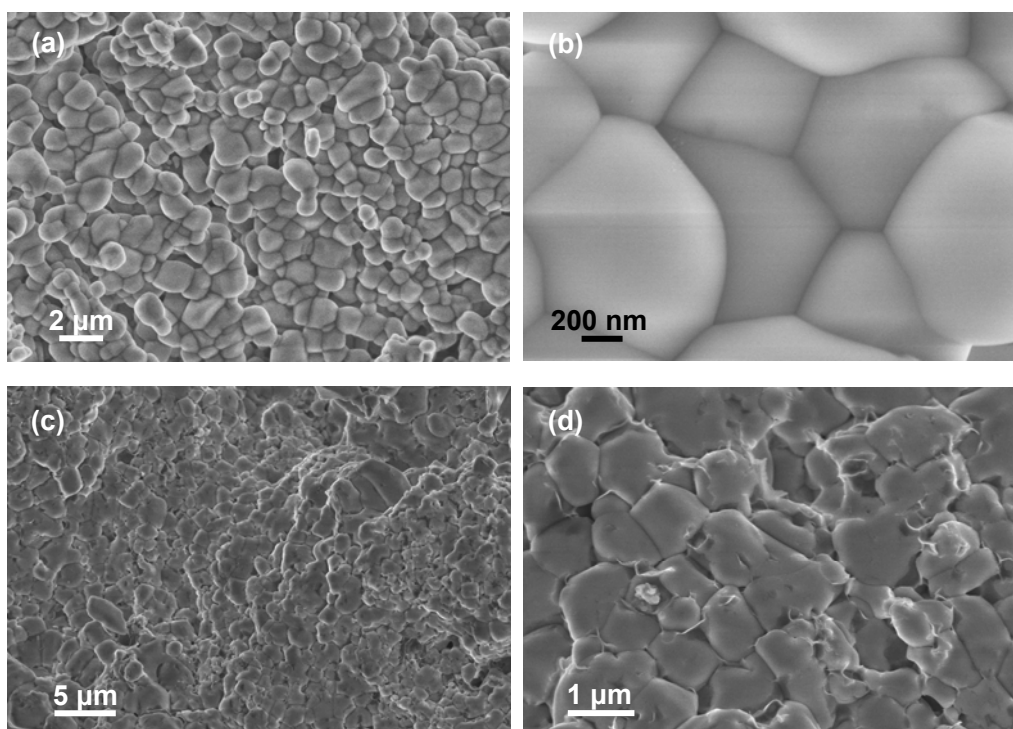

Figure S1. (a)-(b) SEM images of the complex of  $\text{NH}_2\text{CSNH}_2\text{-(NH}_4)_6\text{Mo}_7\text{O}_{24}/\text{NaCl}$  after freeze-drying process, showing that the NaCl particles uniformly coated with a thin film of  $\text{NH}_2\text{CSNH}_2\text{-(NH}_4)_6\text{Mo}_7\text{O}_{24}$  complex were assembled into a 3D structure during the freeze-drying process. (c)-(d) SEM images of the 3D honeycomb-structured  $\text{MoS}_2$  products before removing the NaCl, indicating that the 3D assembly was well preserved after the calcination process and the  $\text{MoS}_2$  walls were actually formed between the surface of 3D NaCl assembly.

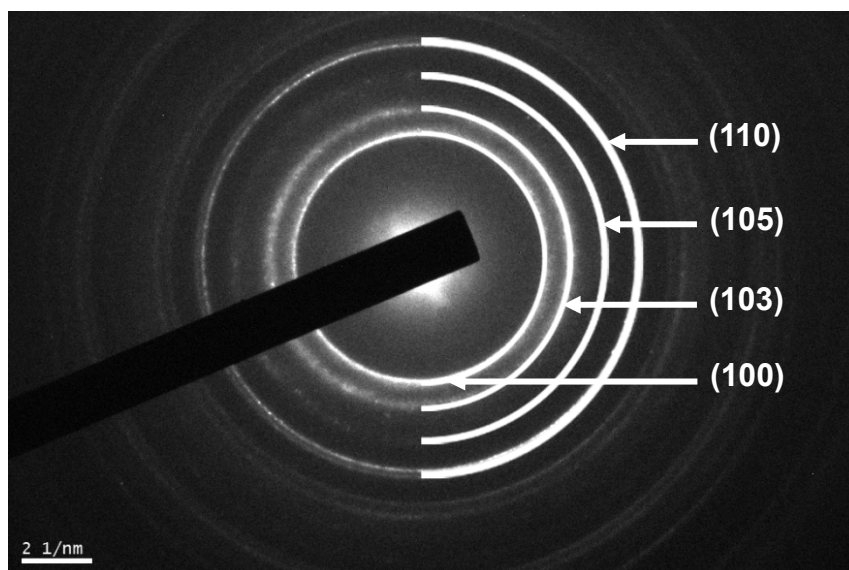

Figure S2. Selected area electron diffraction (SAED) pattern of 3D honeycomb-structured MoS<sub>2</sub>, radially demonstrating the characteristic diffraction rings of (100), (103), (105) and (110) planes belonging to polycrystalline MoS<sub>2</sub>, respectively.

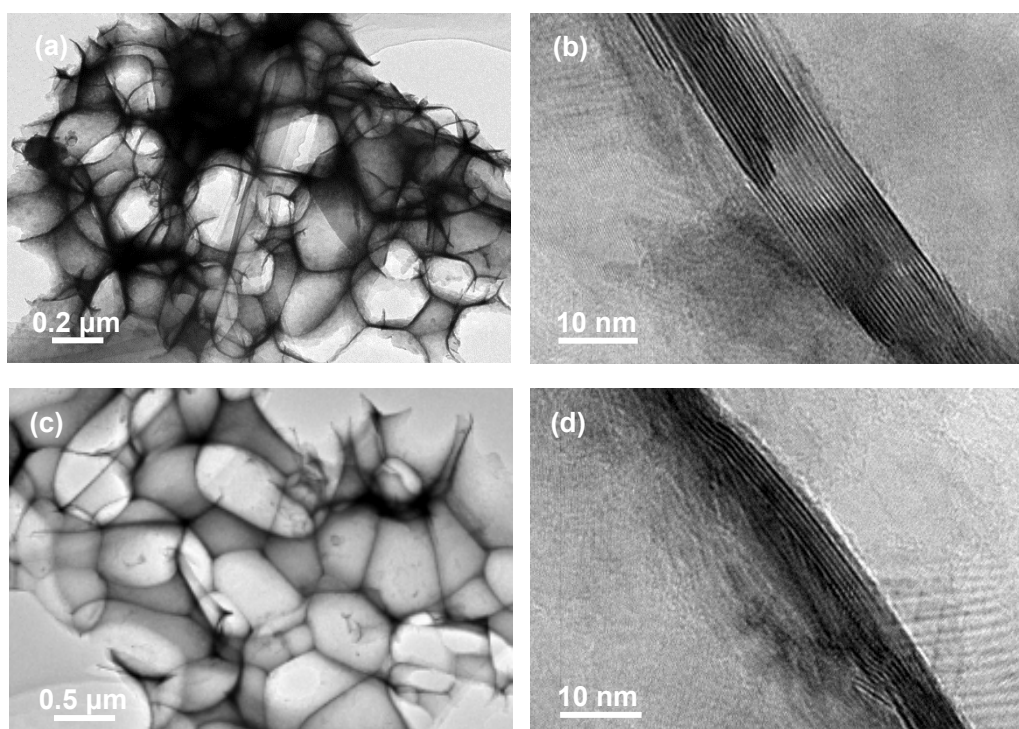

Figure S3. Typical TEM images of 3D honeycomb-structured MoS<sub>2</sub> in the cases of (a)-(b) the faster freeze-drying process and (c)-(d) the slower freeze-drying process.

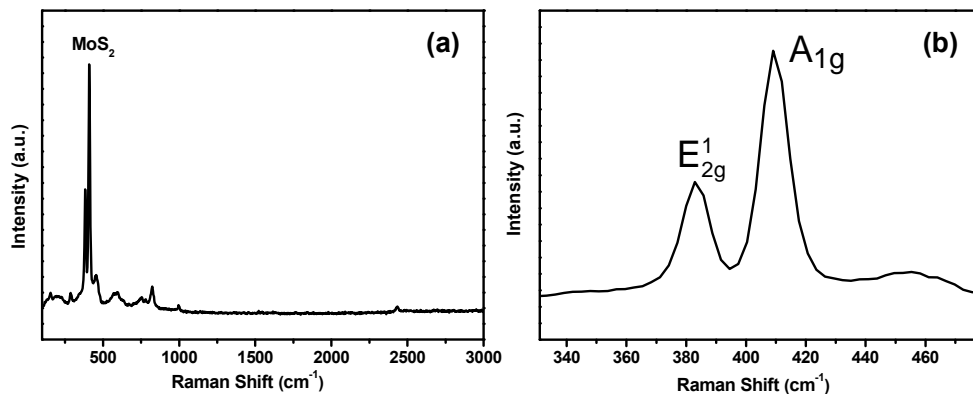

Figure S4. (a) Raman spectrum of 3D honeycomb-structured MoS<sub>2</sub>. (b) Magnified Raman spectrum of 3D honeycomb-structured MoS<sub>2</sub>, exhibiting the typical MoS<sub>2</sub> characteristic signature.

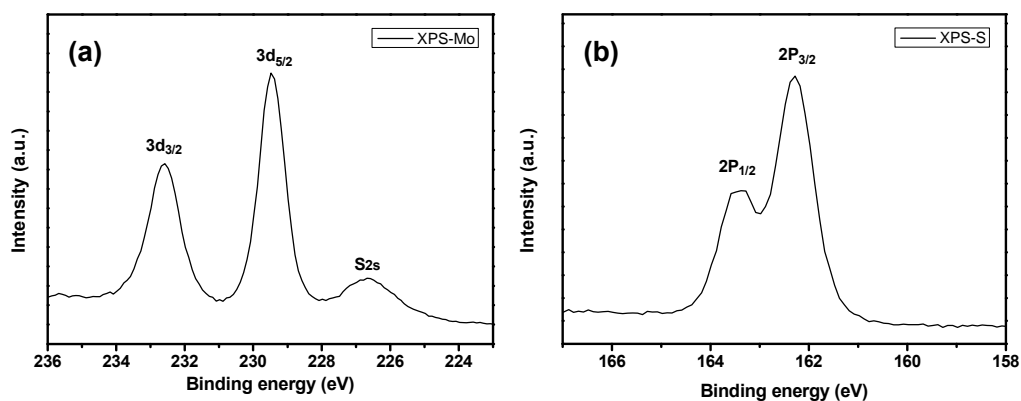

Figure S5. XPS spectra of (a) Mo3d and S2s peaks, and (b) S2p peaks of 3D honeycomb-structured MoS<sub>2</sub>

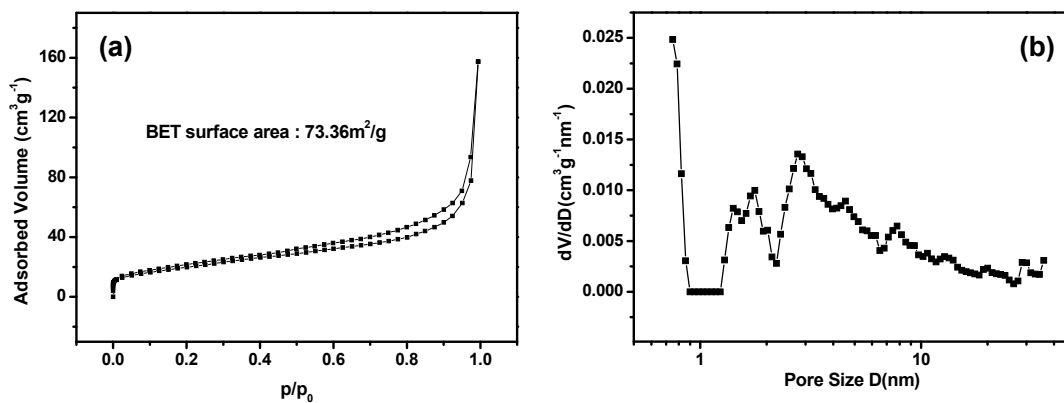

Figure S6. (a) Nitrogen adsorption–desorption isotherms, and (b) pore size distribution curve of

### 3D honeycomb-structured MoS<sub>2</sub>.

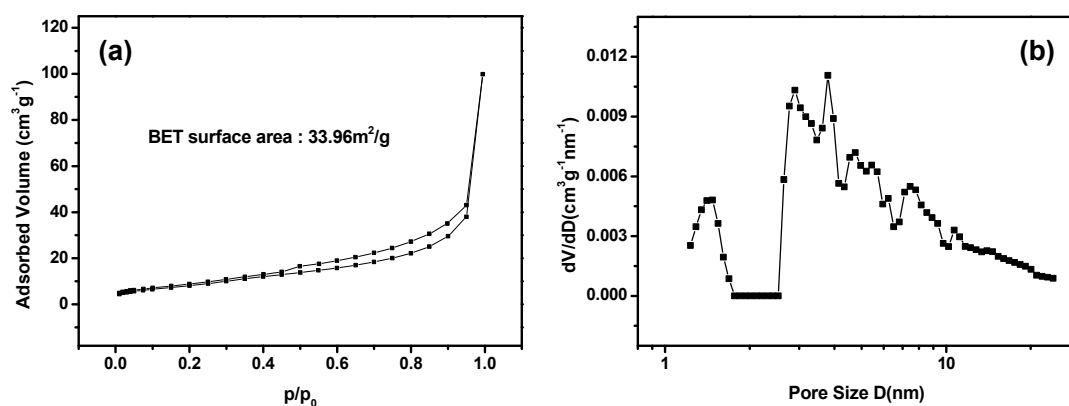

Figure S7. (a) Nitrogen adsorption–desorption isotherms, and (b) pore size distribution curve of 3D honeycomb-structured MoS<sub>2</sub> in the case of the faster freeze-drying process.

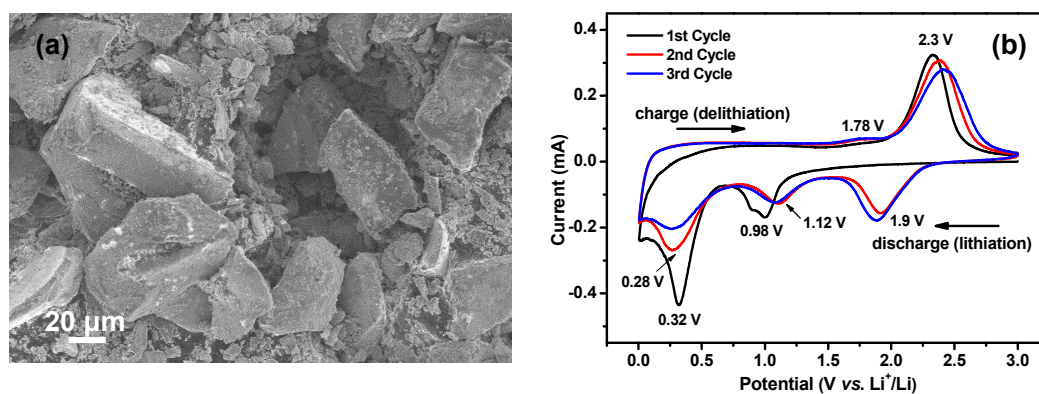

Figure S8. (a) SEM image of MoS<sub>2</sub> blocks synthesized by calcining the freeze-dried mixture of (NH<sub>4</sub>)<sub>6</sub>Mo<sub>7</sub>O<sub>24</sub>·4H<sub>2</sub>O and CH<sub>4</sub>N<sub>2</sub>S without adding NaCl at the same preparation conditions of 3D honeycomb-structured MoS<sub>2</sub>. (b) CV curves of MoS<sub>2</sub> blocks for the initial three cycles at a scanning rate of 0.1 mV s<sup>-1</sup> over a voltage window of 0.005-3 V.

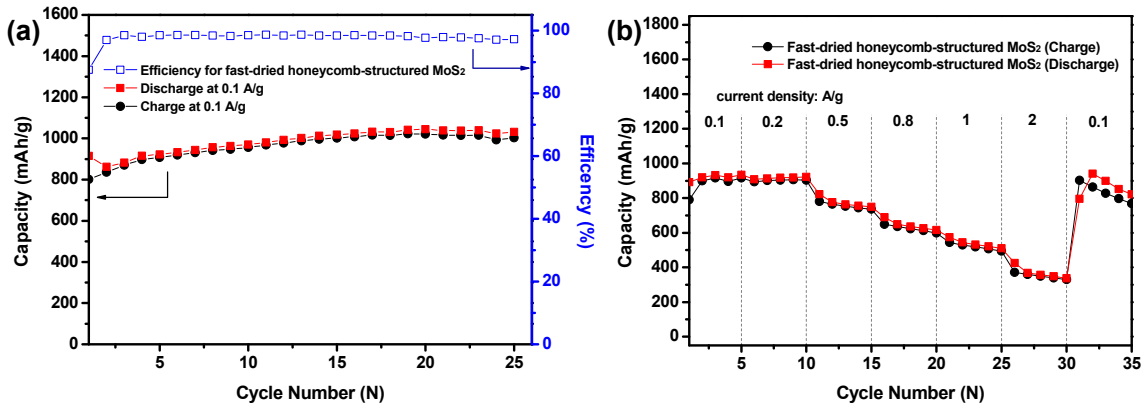

Figure S9. (a) Cycling performance at the initial 25 cycles and (b) rate capability of the electrode of 3D honeycomb-structured MoS<sub>2</sub> obtained by a faster freeze-drying process.

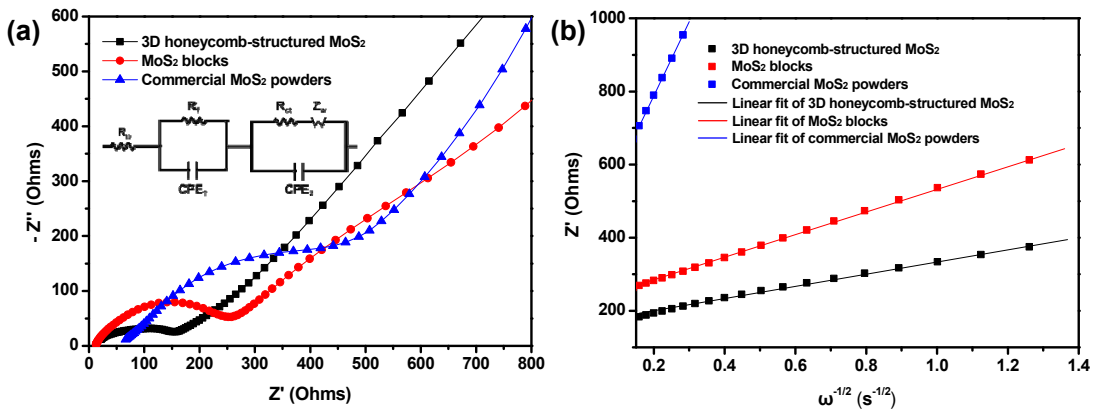

Figure S10. (a) Electrochemical impedance spectroscopy (EIS) with Randles equivalent circuit inset, and (b) linear fits of the relationship between  $Z'$  and  $\omega^{-1/2}$  in the low-frequency region of 3D honeycomb-structured MoS<sub>2</sub>, MoS<sub>2</sub> blocks and commercial MoS<sub>2</sub> powders after the rate test. (The larger solution resistance of the commercial MoS<sub>2</sub> powders electrode should be blamed for the tremendous dissolution into electrolyte of sulfur generated by the serious pulverization coupled with agglomeration of active materials during rate cycles, on account of the poor crystallinity and severe structural defects of commercial MoS<sub>2</sub>.)

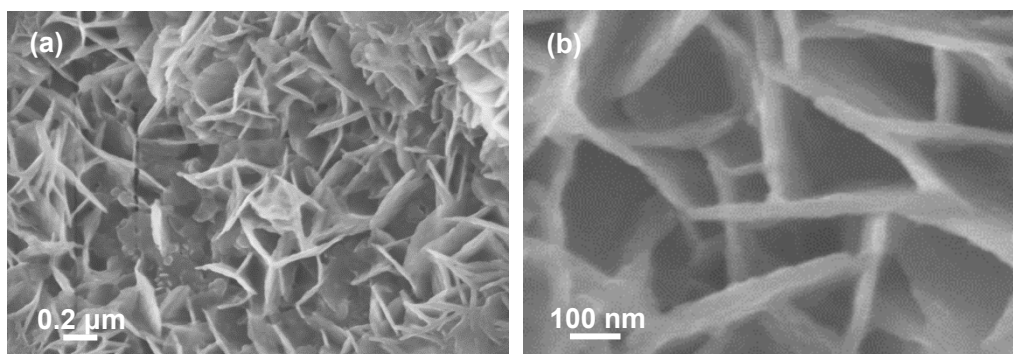

Figure S11. (a) Typical SEM image and (b) partially magnified SEM image of the anode of 3D honeycomb-like structured  $\text{MoS}_2$  with being soaked in DMC for 6h to expose active materials after the rate test, demonstrating a good achievement of 3D porous structure free from re-stacking even after the rapid charge/discharge process.

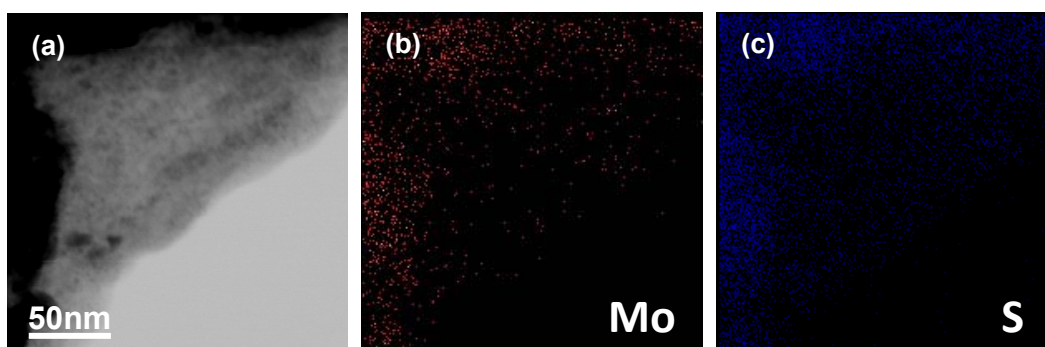

Figure S12. (a) STEM image of a magnified  $\text{MoS}_2$  nanosheet taken from a representative 3D honeycomb-like structured  $\text{MoS}_2$  after rate performance. EDX element mappings of (b) Mo and (c) S, indicating the homogeneous distribution of Mo and S elements in 3D honeycomb-structured  $\text{MoS}_2$ , even after the rapid lithiation/delithiation rate cycles.
